# Supplementary material for: Comparison of Ferroptosis-Inhibitory Mechanisms between Ferrostatin-1 and Dietary Stilbenes (Piceatannol and Astringin)
Source: MDPI journal article supplement (doi:10.3390/molecules26041092), 2021-02-19
Supplement: s1 [file s1]

# Comparison of Ferroptosis-inhibitory Mechanisms between Ferrostatin-1 and Dietary Stilbenes (Piceatannol and Astringin)

Ban Chen <sup>1</sup>, Xican Li <sup>1,\*</sup>, Xiaojian Ouyang <sup>1</sup>, Jie Liu <sup>2,3</sup>, Yangping Liu <sup>4</sup> Dongfeng Chen<sup>2,\*</sup>

<sup>1</sup> School of Chinese Herbal Medicine; Guangzhou University of Chinese Medicine, Guangzhou 510006, China; imchenban@foxmail.com (B.C.); oyxiaojian55@163.com (X.O.)

<sup>2</sup> School of Basic Medical Science, Guangzhou University of Chinese Medicine, Guangzhou 510006, China; 15014173165@163.com (J.L.)

<sup>3</sup> The Research Center of Basic Integrative Medicine, Guangzhou University of Chinese Medicine, Guangzhou 510006, China.

<sup>4</sup> The Fourth Clinical Medical College, Guangzhou University of Chinese Medicine, Waihuan East Road No. 232, Guangzhou Higher Education Mega Center, Guangzhou 510006, China; 20182119168@stu.gzucm.edu.cn (Y.L.)

\* Correspondence: lixc@gzucm.edu.cn (X.L.); lixican@126.com (X.L.); chen888@gzucm.edu.cn (D.C.). Tel: +86-020-39358076; Fax: +86-020-38892690

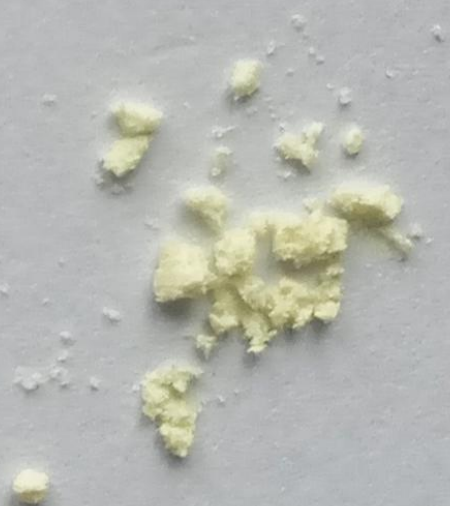

Piceatannol

CAS No.: 10083-24-6

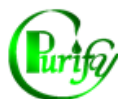

## 产品分析证书

Certificate of Analysis

中文名称：白皮杉醇

English Name : Piceatannol

别名(Alias):

产品编码(Cat. No.):BP1525

CAS Number: 10083-24-6

分子式(M. F.): C<sub>14</sub>H<sub>12</sub>O<sub>4</sub>

分子量(M. W.): 244.246

批号(Batch No.): PRF9091121

报告日期(Report date): 2018-09-11

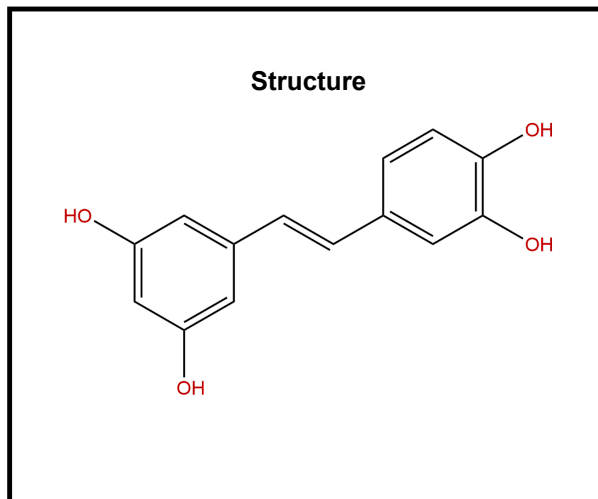

### 检验结果 ( Analytical result ) :

| 检验项目 ( Test Item )         | 检验指标 ( Specifications )   | 检验结果 ( Results )    |
|----------------------------|---------------------------|---------------------|
| 外观Appearance               | Light yellow powder       | Light yellow powder |
| 干燥失重Loss on drying         | < 3.0%                    | 1.45%               |
| 纯度Purity (HPLC-DAD,325nm)* | ≥98.0%                    | 99.06%              |
| 质谱Mass                     | 244.2±1                   | Conforms            |
| 核磁NMR                      | Comply with the structure | Conforms            |

\* 色谱图见附件 ( Please find HPLC chromatography attached. )

检测方法 ( Test Method ) : Column: Thermo HyPURITY C18,4.6\*150mm,3.0um; Column temperature: 30°C; Detection Mode: UV325nm;Flow

Rate: 1.0ml/min;Sample dissolution: Methanol; Mobile Phase: A, Acetonitrile B, 0.1%Phosphoric acid in water;Gradient elution: A, 10%-25%,15min.

贮存条件 ( Storage ) :2~8°C, protected from light, keep package airproofed when not in use.

复测期 ( Retest date ) :Three years (2021-09-10) under conditions list above.

QC:

Zhang Ling

Date: 2018-09-11

QA:

Meng Pan

Date: 2018-09-11

备注(Remarks):The sample solutions should be prepared on the same day, it is the best preparing the solutions immediately before use. If the solutions have to be made up in advance, it should be made as aliquots in tightly sealed vials at less than -20°C. Generally, these might be useable for up to two weeks. The quality of the product is only guaranteed to comply with the attached COA.

In case of quality issue, please contact us within 15 days after receipt of the product.

Chengdu Biopurify Phytochemicals Ltd HPLC Report

|                      |                        |                   |          |
|----------------------|------------------------|-------------------|----------|
| Injection Details    |                        |                   |          |
| Injection Name:      | Piceatannol PRF9091121 | Run Time (min):   | 25.00    |
| Vial Number:         | GA5                    | Injection Volume: | 10.00    |
| Injection Type:      | Unknown                | Channel:          | UV_VIS_1 |
| Calibration Level:   |                        | Wavelength:       | 325      |
| Instrument Method:   | Piceatannol            | Bandwidth:        | 4        |
| Processing Method:   | Piceatannol            | Dilution Factor:  | 1.0000   |
| Injection Date/Time: | 11/09/2018 13:44       | Sample Weight:    | 1.0000   |

Chromatogram

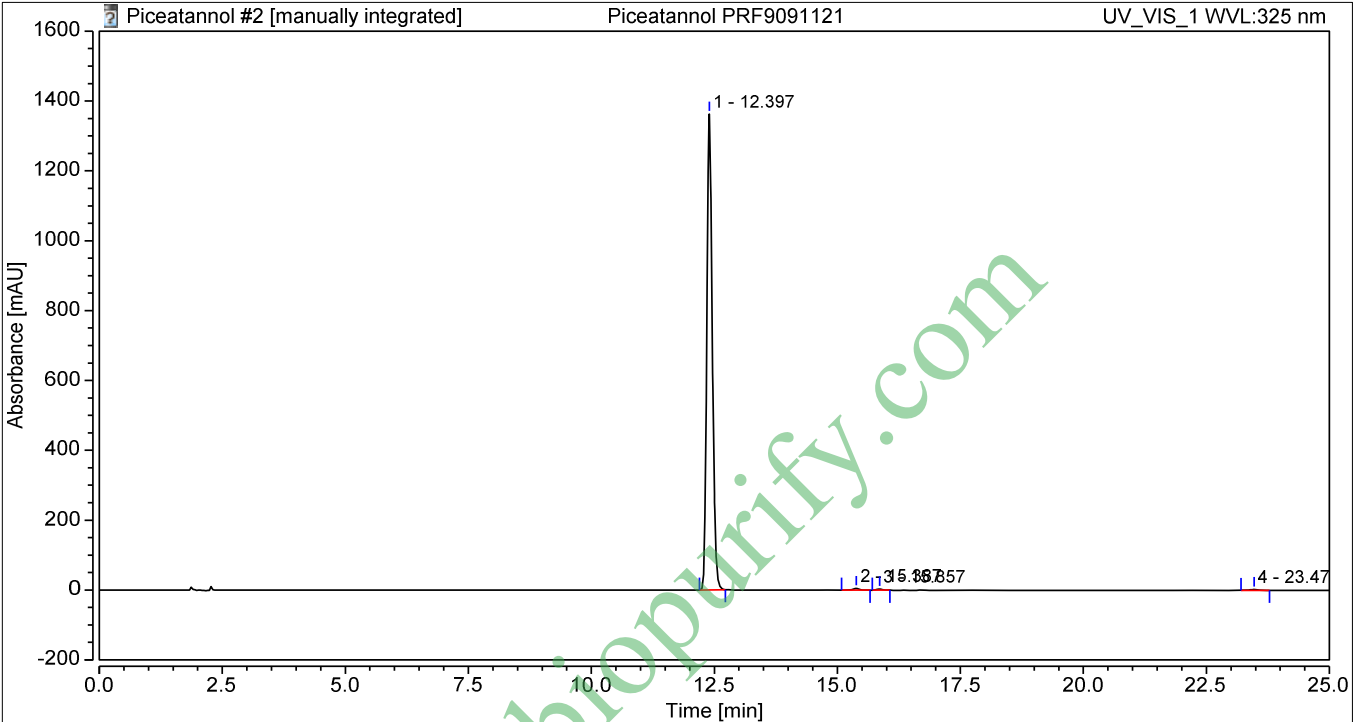

|                     |                |         |          |               |              |                  |           |
|---------------------|----------------|---------|----------|---------------|--------------|------------------|-----------|
| Integration Results |                |         |          |               |              |                  |           |
| No.                 | Retention Time | Area    | Height   | Relative Area | Plates (USP) | Resolution (USP) | Asymmetry |
|                     | min            | mAU*min | mAU      | %             |              |                  |           |
| 1                   | 12.397         | 177.054 | 1362.501 | 99.06         | 59329        | 14.44            | 1.19      |
| 2                   | 15.387         | 0.728   | 5.211    | 0.41          | 85363        | 2.33             | 1.08      |
| 3                   | 15.857         | 0.455   | 3.649    | 0.25          | 108533       | 27.81            | 1.26      |
| 4                   | 23.470         | 0.506   | 2.191    | 0.28          | 69964        | n.a.             | 1.05      |
| Total:              |                | 178.743 | 1373.553 | 100.00        |              |                  | 0.00      |

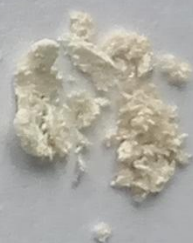

Astringin

CAS No.: 29884-49-9



## CERTIFICATE OF ANALYSIS

### Astringin

[ **Catalog No.** ] CFN92486

[ **CAS No.** ] 29884-49-9

[ **Purity** ]  $\geq 98\%$

[ **M.F** ]  $C_{20}H_{22}O_9$

[ **Physical Description** ] Powder

[ **Solvent** ] DMSO, Pyridine, Methanol, Ethanol, etc.

[ **Weight** ] 10mg

[ **Lot No.** ] CFS201901

[ **Storage** ] Protected from air and light, refrigerate or freeze(2-8 °C)

[ **Intended Use** ] For laboratory use only

[ **Shelf Life** ] 2 years

[ **Chemical Structure** ]

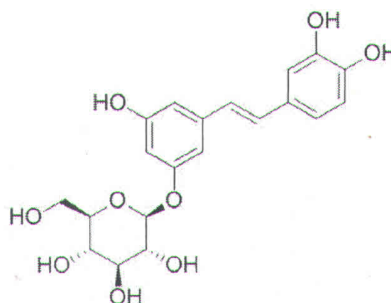

[ **Characterization Data Summary** ]

| Analytical Test                    | Results                             |
|------------------------------------|-------------------------------------|
| Identification by $^1H$ -NMR, HPLC | Consistent with the above structure |
| Purity tested                      | $\geq 98\%$                         |

**Authorized Signature:**

**Date:** Oct 09, 2020

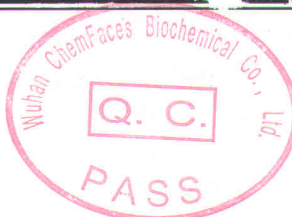

# Analysis Report

## <Sample Information>

Sample Name : CFN92486  
Instrument : SHIMADZU LC-20AT  
Column : Wonda Cract ODS-2 (5 µm, 4.6×250 mm)  
Column Temp. : 35°C  
Mobile phase flow : 1.0 ml/min  
Injection Volume : 5 µL  
Detection Wave. : UV-276nm  
Con. & Solvent : 1mg/ml (Methanol)

## <Analysis condition>

5%→100% Acetonitrile in 0.05% Phosphoric acid H<sub>2</sub>O  
over 10.0min followed by 100% Acetonitrile to 17.0 min

## <Chromatogram>

mV

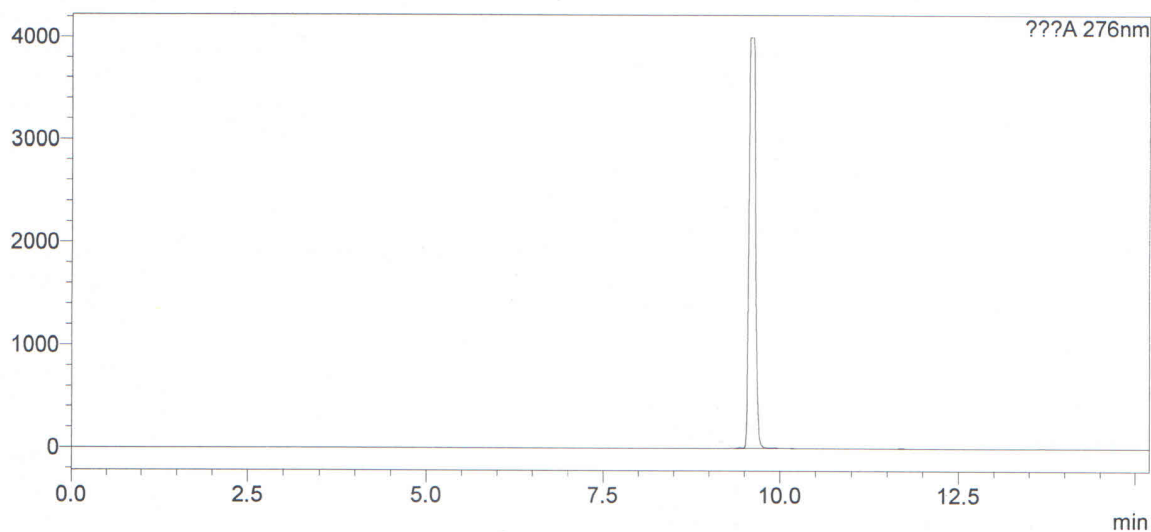

## <Peak Table>

???A 276nm

| Peak# | Ret. Time | Area     | Height  | Conc.  | Unit | Area%   |
|-------|-----------|----------|---------|--------|------|---------|
| 1     | 9.442     | 39689    | 7201    | 0.155  |      | 0.155   |
| 2     | 9.579     | 25478593 | 3998904 | 99.649 |      | 99.649  |
| 3     | 9.924     | 28244    | 5818    | 0.110  |      | 0.110   |
| 4     | 11.701    | 21818    | 4614    | 0.085  |      | 0.085   |
| Total |           | 25568344 | 4016538 |        |      | 100.000 |
