# Supplementary material for: Comparison of Ferroptosis-Inhibitory Mechanisms between Ferrostatin-1 and Dietary Stilbenes (Piceatannol and Astringin)
Source: MDPI journal article supplement (doi:10.3390/molecules26041092), 2021-02-19
Supplement: s1 [file s1]

# Comparison of Ferroptosis-inhibitory Mechanisms between Ferrostatin-1 and Dietary Stilbenes (Piceatannol and Astringin)

Ban Chen <sup>1</sup>, Xican Li <sup>1,\*</sup>, Xiaojian Ouyang <sup>1</sup>, Jie Liu <sup>2,3</sup>, Yangping Liu <sup>4</sup> Dongfeng Chen<sup>2,\*</sup>

<sup>1</sup> School of Chinese Herbal Medicine; Guangzhou University of Chinese Medicine, Guangzhou 510006, China; imchenban@foxmail.com (B.C.); oyxiaojian55@163.com (X.O.)

<sup>2</sup> School of Basic Medical Science, Guangzhou University of Chinese Medicine, Guangzhou 510006, China; 15014173165@163.com (J.L.)

<sup>3</sup> The Research Center of Basic Integrative Medicine, Guangzhou University of Chinese Medicine, Guangzhou 510006, China.

<sup>4</sup> The Fourth Clinical Medical College, Guangzhou University of Chinese Medicine, Waihuan East Road No. 232, Guangzhou Higher Education Mega Center, Guangzhou 510006, China; 20182119168@stu.gzucm.edu.cn (Y.L.)

\* Correspondence: lixc@gzucm.edu.cn (X.L.); lixican@126.com (X.L.); chen888@gzucm.edu.cn (D.C.). Tel: +86-020-39358076; Fax: +86-020-38892690

**Note:** This Supporting Information provides the original data of [Table 1](#) in the main text. All data with [underline](#) are mentioned in **Table 1**.

# 1. $\cdot\text{O}_2^-$ -scavenging assay

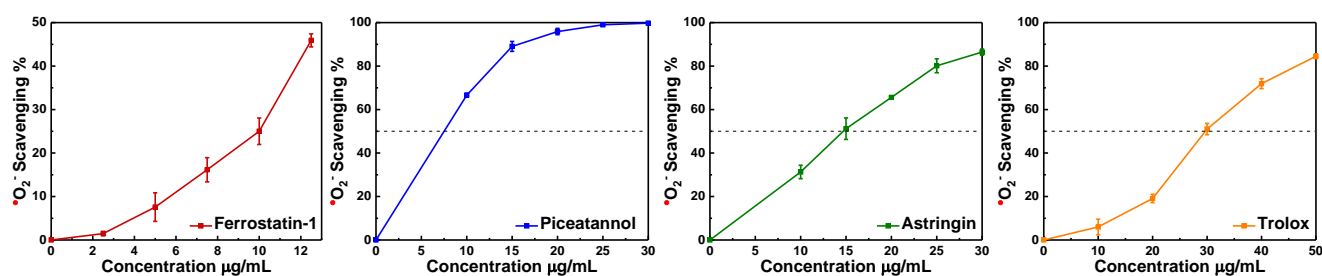

**Fig. S3.1** The dose response curves of Ferrostatin-1, piceatannol, astringin, and Trolox in  $\cdot\text{O}_2^-$ -scavenging assay.

**Tab. S3.1** The comparison of  $\text{IC}_{50}$  values of Ferrostatin-1, piceatannol, astringin, and Trolox in  $\cdot\text{O}_2^-$ -scavenging assay.

|                                     | Ferrostatin-1                      | Piceatannol                        | Astringin                          | Trolox                              |
|-------------------------------------|------------------------------------|------------------------------------|------------------------------------|-------------------------------------|
| $\mu\text{g/mL}$                    | $15.3 \pm 0.7$                     | $7.5 \pm 0.1$                      | $15.4 \pm 0.1$                     | $31.8 \pm 1.1$                      |
| <u><math>\mu\text{mol/L}</math></u> | <u><math>58.2 \pm 2.7^b</math></u> | <u><math>30.7 \pm 0.4^a</math></u> | <u><math>37.8 \pm 0.3^a</math></u> | <u><math>127.0 \pm 4.2^c</math></u> |

The  $\text{IC}_{50}$  value was defined as the final concentration of 50% scavenging power, calculated by linear regression analysis, and expressed as the mean  $\pm$  SD ( $n = 3$ ). The linear regression was analyzed by the Origin 2017 professional software. The  $\text{IC}_{50}$  values with different superscripts (<sup>a</sup>, <sup>b</sup>, or <sup>c</sup>) in the same row, are significantly different ( $p < 0.05$ ). Trolox is the positive control.

2. PTIO•-scavenging assay (pH 4.5)

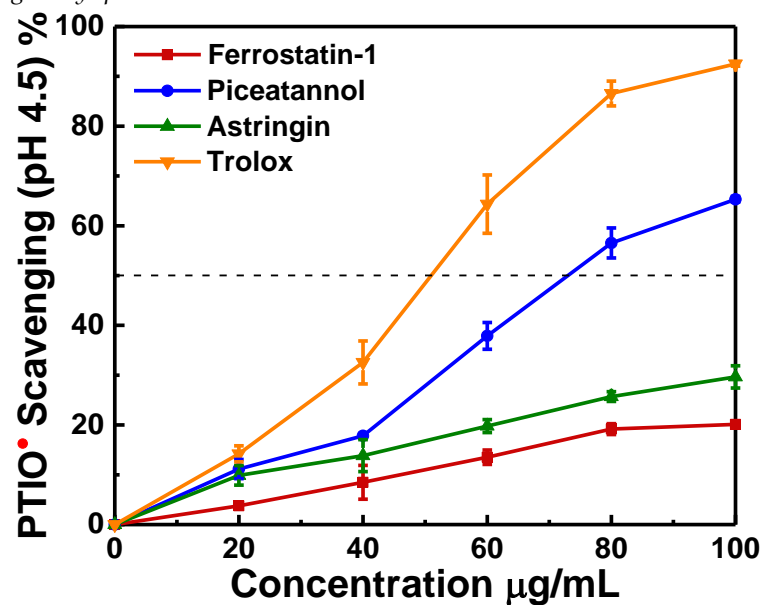

Fig. S3.2 The dose response curves of Ferrostatin-1, piceatannol, astringin, and Trolox in PTIO•-scavenging (pH 4.5) assay.

Tab. S3.2 The comparison of IC<sub>50</sub> values of Ferrostatin-1, piceatannol, astringin, and Trolox in PTIO•-scavenging (pH 4.5) assay.

|               | Ferrostatin-1                 | Piceatannol                   | Astringin                     | Trolox                       |
|---------------|-------------------------------|-------------------------------|-------------------------------|------------------------------|
| μg/mL         | 230.6±8.7                     | 76.3±2.9                      | 167.1±10.4                    | 51.6±2.1                     |
| <u>μmol/L</u> | <u>878.9±33.0<sup>d</sup></u> | <u>312.5±12.0<sup>b</sup></u> | <u>411.1±25.6<sup>c</sup></u> | <u>206.2±8.5<sup>a</sup></u> |

The IC<sub>50</sub> value was defined as the final concentration of 50% scavenging power, calculated by linear regression analysis, and expressed as the mean ± SD (n = 3). The linear regression was analyzed by the Origin 2017 professional software. The IC<sub>50</sub> values with different superscripts (a, b, c, or d) in the same row, are significantly different ( $p < 0.05$ ). Trolox is the positive control.

### 3. PTIO•-scavenging assay (pH 7.4)

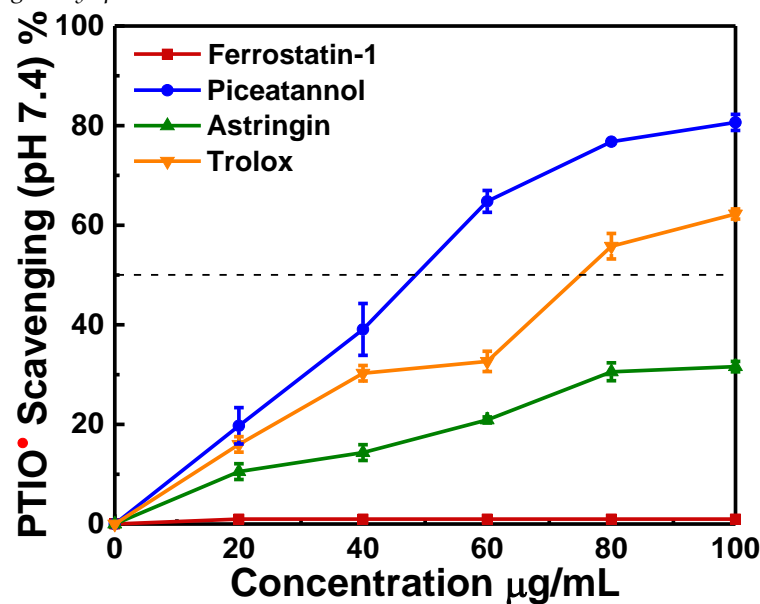

Fig. S3.2 The dose response curves of Ferrostatin-1, piceatannol, astringin, and Trolox in PTIO•-scavenging (pH 7.4) assay.

Tab. S3.2 The comparison of IC<sub>50</sub> values of Ferrostatin-1, piceatannol, astringin, and Trolox in PTIO•-scavenging (pH 7.4) assay.

|        | Ferrostatin-1 | Piceatannol            | Astringin               | Trolox                 |
|--------|---------------|------------------------|-------------------------|------------------------|
| µg/mL  | >10000        | 53.7±1.7               | 149.9±5.3               | 77.8±1.4               |
| µmol/L | >10000        | 219.8±7.0 <sup>a</sup> | 368.8±12.9 <sup>b</sup> | 310.7±5.8 <sup>b</sup> |

The IC<sub>50</sub> value was defined as the final concentration of 50% scavenging power, calculated by linear regression analysis, and expressed as the mean ± SD (n = 3). The linear regression was analyzed by the Origin 2017 professional software. The IC<sub>50</sub> values with different superscripts (<sup>a</sup> or <sup>b</sup>) in the same row, are significantly different ( $p < 0.05$ ). Trolox is the positive control.

#### 4. $Fe^{3+}$ -reducing assay

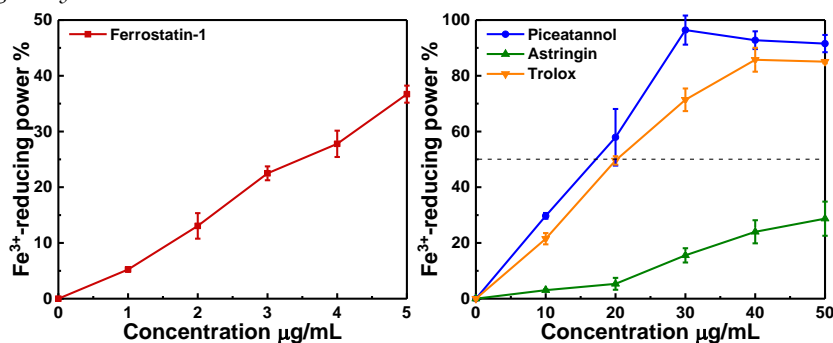

Fig. S3.2 The dose response curves of Ferrostatin-1, piceatannol, astringin, and Trolox in  $Fe^{3+}$ -reducing assay.

Tab. S3.2 The comparison of  $IC_{50}$  values of Ferrostatin-1, piceatannol, astringin, and Trolox in  $Fe^{3+}$ -reducing assay.

|             | Ferrostatin-1                      | Piceatannol                        | Astringin                           | Trolox                             |
|-------------|------------------------------------|------------------------------------|-------------------------------------|------------------------------------|
| $\mu g/mL$  | $6.7 \pm 0.1$                      | $16.7 \pm 1.3$                     | $72.7 \pm 1.1$                      | $22.2 \pm 0.4$                     |
| $\mu mol/L$ | <u><math>25.6 \pm 0.3^a</math></u> | <u><math>68.2 \pm 5.3^b</math></u> | <u><math>178.9 \pm 2.8^c</math></u> | <u><math>88.8 \pm 1.8^b</math></u> |

The  $IC_{50}$  value was defined as the final concentration of 50% reducing power, calculated by linear regression analysis, and expressed as the mean  $\pm$  SD ( $n = 3$ ). The linear regression was analyzed by the Origin 2017 professional software. The  $IC_{50}$  values with different superscripts (<sup>a</sup>, <sup>b</sup>, or <sup>c</sup>) in the same row, are significantly different ( $p < 0.05$ ). Trolox is the positive control.
