# Supplementary material for: Comparison of Ferroptosis-Inhibitory Mechanisms between Ferrostatin-1 and Dietary Stilbenes (Piceatannol and Astringin)
Source: MDPI journal article supplement (doi:10.3390/molecules26041092), 2021-02-19
Supplement: s1 [file s1]

# Comparison of Ferroptosis-inhibitory Mechanisms between Ferrostatin-1 and Dietary Stilbenes (Piceatannol and Astringin)

Ban Chen <sup>1</sup>, Xican Li <sup>1,\*</sup>, Xiaojian Ouyang <sup>1</sup>, Jie Liu <sup>2,3</sup>, Yangping Liu <sup>4</sup> Dongfeng Chen<sup>2,\*</sup>

<sup>1</sup> School of Chinese Herbal Medicine; Guangzhou University of Chinese Medicine, Guangzhou 510006, China; imchenban@foxmail.com (B.C.); oyxiaojian55@163.com (X.O.)

<sup>2</sup> School of Basic Medical Science, Guangzhou University of Chinese Medicine, Guangzhou 510006, China; 15014173165@163.com (J.L.)

<sup>3</sup> The Research Center of Basic Integrative Medicine, Guangzhou University of Chinese Medicine, Guangzhou 510006, China.

<sup>4</sup> The Fourth Clinical Medical College, Guangzhou University of Chinese Medicine, Waihuan East Road No. 232, Guangzhou Higher Education Mega Center, Guangzhou 510006, China; 20182119168@stu.gzucm.edu.cn (Y.L.)

\* Correspondence: lixc@gzucm.edu.cn (X.L.); lixican@126.com (X.L.); chen888@gzucm.edu.cn (D.C.). Tel: +86-020-39358076; Fax: +86-020-38892690

Table S2.1 The partial calculation results of Ferrostatin-1

| Ferrostatin-1 calculated at M06-2X-D3/6-311+G** level in methanol SMD solvation model |           |           |           |                                             |              |
|---------------------------------------------------------------------------------------|-----------|-----------|-----------|---------------------------------------------|--------------|
| Cartesian coordinates of optimized molecule                                           |           |           |           | Thermal properties /(Hartree)               |              |
| Symbol                                                                                | X         | Y         | Z         | Zero-point correction                       | 0.358188     |
| C                                                                                     | 3.785627  | -1.237323 | 1.669815  | Thermal correction to Energy                | 0.376542     |
| C                                                                                     | 4.936856  | -0.234628 | 1.575344  | Thermal correction to Enthalpy              | 0.377486     |
| C                                                                                     | 4.171802  | 0.411268  | -0.736583 | Thermal correction to Gibbs Free Energy     | 0.310586     |
| C                                                                                     | 3.031282  | -0.604455 | -0.643158 | Sum of electronic and zero-point Energies   | -844.367961  |
| C                                                                                     | 2.594199  | -0.806794 | 0.808483  | Sum of electronic and thermal Energies      | -844.349607  |
| C                                                                                     | -0.391702 | -1.044722 | -1.271547 | Sum of electronic and thermal Enthalpies    | -844.348663  |
| C                                                                                     | 0.604198  | -0.085292 | -1.081477 | Sum of electronic and thermal Free Energies | -844.415563  |
| N                                                                                     | 1.910929  | -0.277445 | -1.582571 | Single point energy at def2-TZVPD basis set | -844.8137027 |
| C                                                                                     | -1.691085 | -0.848413 | -0.822135 |                                             |              |
| C                                                                                     | -2.003574 | 0.335094  | -0.153642 |                                             |              |
| C                                                                                     | -1.02705  | 1.316065  | 0.025782  |                                             |              |
| C                                                                                     | 0.270197  | 1.132308  | -0.445253 |                                             |              |
| C                                                                                     | -3.365652 | 0.602529  | 0.370131  |                                             |              |
| O                                                                                     | -4.232165 | -0.373092 | 0.104676  |                                             |              |
| C                                                                                     | -5.583443 | -0.194543 | 0.585071  |                                             |              |
| C                                                                                     | -6.366582 | -1.417315 | 0.175224  |                                             |              |
| N                                                                                     | 1.243773  | 2.113244  | -0.275534 |                                             |              |
| O                                                                                     | -3.676628 | 1.605347  | 0.982019  |                                             |              |
| C                                                                                     | 5.361502  | -0.029184 | 0.120302  |                                             |              |
| H                                                                                     | 3.464464  | -1.352597 | 2.708825  |                                             |              |
| H                                                                                     | 4.136705  | -2.220544 | 1.333035  |                                             |              |
| H                                                                                     | 4.612541  | 0.726269  | 1.993948  |                                             |              |
| H                                                                                     | 5.785324  | -0.575913 | 2.175477  |                                             |              |
| H                                                                                     | 4.469721  | 0.523807  | -1.783289 |                                             |              |
| H                                                                                     | 3.823604  | 1.388022  | -0.384424 |                                             |              |
| H                                                                                     | 3.432154  | -1.56436  | -0.991002 |                                             |              |
| H                                                                                     | 2.18307   | 0.129511  | 1.201763  |                                             |              |
| H                                                                                     | 1.80271   | -1.560622 | 0.857465  |                                             |              |
| H                                                                                     | -0.127037 | -1.968636 | -1.776122 |                                             |              |
| H                                                                                     | 1.878667  | -0.997085 | -2.29499  |                                             |              |
| H                                                                                     | -2.442002 | -1.612582 | -0.975025 |                                             |              |
| H                                                                                     | -1.284829 | 2.248585  | 0.516768  |                                             |              |
| H                                                                                     | -5.550579 | -0.074981 | 1.669576  |                                             |              |
| H                                                                                     | -5.988786 | 0.717162  | 0.142378  |                                             |              |
| H                                                                                     | -7.397076 | -1.318486 | 0.522305  |                                             |              |
| H                                                                                     | -6.376635 | -1.525405 | -0.911227 |                                             |              |
| H                                                                                     | -5.937778 | -2.318633 | 0.617871  |                                             |              |
| H                                                                                     | 0.864813  | 3.043913  | -0.148174 |                                             |              |
| H                                                                                     | 1.952061  | 2.094524  | -1.001507 |                                             |              |

|                                                                                      |           |           |           |                                             |              |
|--------------------------------------------------------------------------------------|-----------|-----------|-----------|---------------------------------------------|--------------|
| H                                                                                    | 6.162719  | 0.712274  | 0.055721  |                                             |              |
| H                                                                                    | 5.764159  | -0.970444 | -0.274323 |                                             |              |
| Ferrostatin-1 calculated at M06-2X-D3/6-311+G** level in aqueous SMD solvation model |           |           |           |                                             |              |
| Cartesian coordinates of optimized molecule                                          |           |           |           | Thermal properties /(Hartree)               |              |
| Symbol                                                                               | X         | Y         | Z         | Zero-point correction                       | 0.358268     |
| C                                                                                    | 3.783834  | -1.281385 | 1.639738  | Thermal correction to Energy                | 0.376623     |
| C                                                                                    | 4.916914  | -0.255817 | 1.584271  | Thermal correction to Enthalpy              | 0.377568     |
| C                                                                                    | 4.158778  | 0.447719  | -0.712533 | Thermal correction to Gibbs Free Energy     | 0.310677     |
| C                                                                                    | 3.036447  | -0.590073 | -0.658742 | Sum of electronic and zero-point Energies   | -844.358591  |
| C                                                                                    | 2.592474  | -0.845487 | 0.78185   | Sum of electronic and thermal Energies      | -844.340236  |
| C                                                                                    | -0.386629 | -1.033411 | -1.280897 | Sum of electronic and thermal Enthalpies    | -844.339291  |
| C                                                                                    | 0.609869  | -0.075245 | -1.08519  | Sum of electronic and thermal Free Energies | -844.406182  |
| N                                                                                    | 1.912581  | -0.269752 | -1.598899 | Single point energy at def2-TZVPD basis set | -844.8044063 |
| C                                                                                    | -1.685366 | -0.842787 | -0.82882  |                                             |              |
| C                                                                                    | -1.99864  | 0.335326  | -0.151104 |                                             |              |
| C                                                                                    | -1.02122  | 1.313564  | 0.035698  |                                             |              |
| C                                                                                    | 0.276216  | 1.134727  | -0.436189 |                                             |              |
| C                                                                                    | -3.360015 | 0.599278  | 0.374488  |                                             |              |
| O                                                                                    | -4.228292 | -0.374992 | 0.102925  |                                             |              |
| C                                                                                    | -5.579341 | -0.195623 | 0.585313  |                                             |              |
| C                                                                                    | -6.367981 | -1.411988 | 0.167812  |                                             |              |
| N                                                                                    | 1.244406  | 2.119614  | -0.251327 |                                             |              |
| O                                                                                    | -3.671026 | 1.59899   | 0.993488  |                                             |              |
| C                                                                                    | 5.348663  | -0.002464 | 0.139201  |                                             |              |
| H                                                                                    | 3.457228  | -1.434575 | 2.671639  |                                             |              |
| H                                                                                    | 4.155197  | -2.246307 | 1.274252  |                                             |              |
| H                                                                                    | 4.570854  | 0.686772  | 2.025637  |                                             |              |
| H                                                                                    | 5.76627   | -0.598159 | 2.18166   |                                             |              |
| H                                                                                    | 4.464146  | 0.597371  | -1.751789 |                                             |              |
| H                                                                                    | 3.79665   | 1.407387  | -0.330817 |                                             |              |
| H                                                                                    | 3.460891  | -1.529252 | -1.031534 |                                             |              |
| H                                                                                    | 2.161035  | 0.070554  | 1.20032   |                                             |              |
| H                                                                                    | 1.813919  | -1.613677 | 0.799344  |                                             |              |
| H                                                                                    | -0.12187  | -1.951995 | -1.79439  |                                             |              |
| H                                                                                    | 1.866833  | -1.016132 | -2.282432 |                                             |              |
| H                                                                                    | -2.434867 | -1.6065   | -0.987798 |                                             |              |
| H                                                                                    | -1.276884 | 2.242309  | 0.534299  |                                             |              |
| H                                                                                    | -5.545017 | -0.084182 | 1.670156  |                                             |              |
| H                                                                                    | -5.981236 | 0.720226  | 0.149308  |                                             |              |
| H                                                                                    | -7.396991 | -1.310133 | 0.516885  |                                             |              |
| H                                                                                    | -6.379939 | -1.512194 | -0.918891 |                                             |              |
| H                                                                                    | -5.943181 | -2.317808 | 0.603876  |                                             |              |
| H                                                                                    | 0.853771  | 3.046253  | -0.131565 |                                             |              |

|   |          |           |           |  |  |
|---|----------|-----------|-----------|--|--|
| H | 1.96013  | 2.10728   | -0.969247 |  |  |
| H | 6.14004  | 0.750604  | 0.101619  |  |  |
| H | 5.764641 | -0.926882 | -0.279627 |  |  |

Table S2.2 The partial calculation results of piceatannol

| Piceatannol calculated at M06-2X-D3/6-311+G** level in methanol SMD solvation model |           |           |           |                                             |              |
|-------------------------------------------------------------------------------------|-----------|-----------|-----------|---------------------------------------------|--------------|
| Cartesian coordinates of optimized molecule                                         |           |           |           | Thermal properties /(Hartree)               |              |
| Symbol                                                                              | X         | Y         | Z         | Zero-point correction                       | 0.232282     |
| C                                                                                   | -0.381757 | 0.298187  | -0.011406 | Thermal correction to Energy                | 0.248535     |
| C                                                                                   | 0.627627  | -0.583002 | -0.040316 | Thermal correction to Enthalpy              | 0.249479     |
| C                                                                                   | -1.815117 | -0.025904 | -0.025349 | Thermal correction to Gibbs Free Energy     | 0.187300     |
| C                                                                                   | 2.061153  | -0.252488 | -0.026584 | Sum of electronic and zero-point Energies   | -841.309835  |
| C                                                                                   | -2.732209 | 1.026636  | 0.099827  | Sum of electronic and thermal Energies      | -841.293582  |
| C                                                                                   | -2.310634 | -1.328993 | -0.15998  | Sum of electronic and thermal Enthalpies    | -841.292638  |
| C                                                                                   | 2.972718  | -1.306907 | 0.064253  | Sum of electronic and thermal Free Energies | -841.354817  |
| C                                                                                   | 2.537221  | 1.065093  | -0.100476 | Single point energy at def2-TZVPD basis set | -841.6364985 |
| C                                                                                   | -4.097085 | 0.790216  | 0.096687  |                                             |              |
| C                                                                                   | -3.678673 | -1.56849  | -0.161977 |                                             |              |
| C                                                                                   | 4.341484  | -1.04546  | 0.089607  |                                             |              |
| C                                                                                   | 3.904652  | 1.300794  | -0.073725 |                                             |              |
| O                                                                                   | -4.959815 | 1.839642  | 0.220795  |                                             |              |
| C                                                                                   | -4.576788 | -0.516134 | -0.03378  |                                             |              |
| O                                                                                   | 5.178263  | -2.118479 | 0.185051  |                                             |              |
| C                                                                                   | 4.823078  | 0.254997  | 0.021049  |                                             |              |
| O                                                                                   | 4.421194  | 2.561794  | -0.140699 |                                             |              |
| O                                                                                   | -5.933603 | -0.659799 | -0.027345 |                                             |              |
| H                                                                                   | -0.161652 | 1.361875  | 0.035245  |                                             |              |
| H                                                                                   | 0.411727  | -1.647855 | -0.064394 |                                             |              |
| H                                                                                   | -2.384742 | 2.049676  | 0.202644  |                                             |              |
| H                                                                                   | -1.635642 | -2.169201 | -0.268407 |                                             |              |
| H                                                                                   | 2.627993  | -2.33336  | 0.120159  |                                             |              |
| H                                                                                   | 1.861399  | 1.908756  | -0.184225 |                                             |              |
| H                                                                                   | -4.064384 | -2.577492 | -0.266842 |                                             |              |
| H                                                                                   | -5.870245 | 1.513532  | 0.197211  |                                             |              |
| H                                                                                   | 6.098877  | -1.827092 | 0.202151  |                                             |              |
| H                                                                                   | 5.88783   | 0.461547  | 0.038668  |                                             |              |
| H                                                                                   | 3.707532  | 3.209872  | -0.200587 |                                             |              |
| H                                                                                   | -6.181013 | -1.586787 | -0.141013 |                                             |              |
| Piceatannol calculated at M06-2X-D3/6-311+G** level in aqueous SMD solvation model  |           |           |           |                                             |              |
| Cartesian coordinates of optimized molecule                                         |           |           |           | Thermal properties /(Hartree)               |              |
| Symbol                                                                              | X         | Y         | Z         | Zero-point correction                       | 0.232129     |
| C                                                                                   | -0.380876 | 0.296798  | -0.010642 | Thermal correction to Energy                | 0.248362     |
| C                                                                                   | 0.627485  | -0.585484 | -0.039011 | Thermal correction to Enthalpy              | 0.249307     |
| C                                                                                   | -1.814084 | -0.026984 | -0.023253 | Thermal correction to Gibbs Free Energy     | 0.187262     |
| C                                                                                   | 2.060592  | -0.254187 | -0.026168 | Sum of electronic and zero-point Energies   | -841.304918  |
| C                                                                                   | -2.730256 | 1.026992  | 0.094174  | Sum of electronic and thermal Energies      | -841.288685  |
| C                                                                                   | -2.309498 | -1.331051 | -0.149015 | Sum of electronic and thermal Enthalpies    | -841.287741  |

|   |           |           |           |                                             |              |
|---|-----------|-----------|-----------|---------------------------------------------|--------------|
| C | 2.973325  | -1.308261 | 0.059437  | Sum of electronic and thermal Free Energies | -841.349785  |
| C | 2.535023  | 1.063954  | -0.095387 | Single point energy at def2-TZVPD basis set | -841.6312705 |
| C | -4.094789 | 0.790151  | 0.091169  |                                             |              |
| C | -3.677415 | -1.570081 | -0.15127  |                                             |              |
| C | 4.340876  | -1.044126 | 0.083907  |                                             |              |
| C | 3.901967  | 1.300297  | -0.06972  |                                             |              |
| O | -4.962161 | 1.844566  | 0.208286  |                                             |              |
| C | -4.574603 | -0.516027 | -0.031606 |                                             |              |
| O | 5.185451  | -2.119253 | 0.175194  |                                             |              |
| C | 4.822274  | 0.256435  | 0.019269  |                                             |              |
| O | 4.415551  | 2.569345  | -0.13245  |                                             |              |
| O | -5.936024 | -0.662816 | -0.02673  |                                             |              |
| H | -0.160511 | 1.360356  | 0.033558  |                                             |              |
| H | 0.41162   | -1.650185 | -0.062492 |                                             |              |
| H | -2.381058 | 2.04972   | 0.190087  |                                             |              |
| H | -1.634037 | -2.171528 | -0.249572 |                                             |              |
| H | 2.628478  | -2.334484 | 0.111925  |                                             |              |
| H | 1.858601  | 1.907467  | -0.173221 |                                             |              |
| H | -4.064994 | -2.578687 | -0.249255 |                                             |              |
| H | -5.869545 | 1.510932  | 0.184953  |                                             |              |
| H | 6.102119  | -1.816302 | 0.193822  |                                             |              |
| H | 5.886968  | 0.461549  | 0.036552  |                                             |              |
| H | 3.693282  | 3.208405  | -0.183922 |                                             |              |
| H | -6.173576 | -1.592524 | -0.138142 |                                             |              |

Table S2.3 The partial calculation results of astringin

| Astringin calculated at M06-2X-D3/6-311+G** level in methanol SMD solvation model |           |           |           |                                             |               |
|-----------------------------------------------------------------------------------|-----------|-----------|-----------|---------------------------------------------|---------------|
| Cartesian coordinates of optimized molecule                                       |           |           |           | Thermal properties /(Hartree)               |               |
| Symbol                                                                            | X         | Y         | Z         | Zero-point correction                       | 0.408893      |
| C                                                                                 | -3.854124 | 0.327293  | -0.880816 | Thermal correction to Energy                | 0.435952      |
| O                                                                                 | -2.535514 | -0.149322 | -1.083274 | Thermal correction to Enthalpy              | 0.436897      |
| O                                                                                 | -4.075947 | 0.741908  | 0.441277  | Thermal correction to Gibbs Free Energy     | 0.351563      |
| C                                                                                 | -4.801207 | -0.788605 | -1.326123 | Sum of electronic and zero-point Energies   | -1451.878359  |
| C                                                                                 | -1.480982 | 0.68748   | -0.835879 | Sum of electronic and thermal Energies      | -1451.851299  |
| C                                                                                 | -4.127306 | -0.26453  | 1.467166  | Sum of electronic and thermal Enthalpies    | -1451.850355  |
| C                                                                                 | -4.886142 | -1.931439 | -0.301145 | Sum of electronic and thermal Free Energies | -1451.935689  |
| O                                                                                 | -6.083557 | -0.239646 | -1.57181  | Single point energy at def2-TZVPD basis set | -1452.4415739 |
| C                                                                                 | -0.226275 | 0.081873  | -0.837587 |                                             |               |
| C                                                                                 | -1.619964 | 2.050287  | -0.587382 |                                             |               |
| C                                                                                 | -5.107427 | -1.380605 | 1.107001  |                                             |               |
| C                                                                                 | -2.738354 | -0.736831 | 1.886742  |                                             |               |
| O                                                                                 | -3.704367 | -2.708902 | -0.258355 |                                             |               |
| C                                                                                 | 0.920489  | 0.839741  | -0.588804 |                                             |               |
| C                                                                                 | -0.462539 | 2.79761   | -0.349914 |                                             |               |
| O                                                                                 | -6.442818 | -0.880155 | 1.10887   |                                             |               |
| O                                                                                 | -1.977984 | 0.349687  | 2.403884  |                                             |               |
| C                                                                                 | 2.218644  | 0.14795   | -0.589802 |                                             |               |
| C                                                                                 | 0.795468  | 2.213975  | -0.347407 |                                             |               |
| O                                                                                 | -0.528918 | 4.138222  | -0.110189 |                                             |               |
| C                                                                                 | 3.381723  | 0.670111  | -0.177111 |                                             |               |
| C                                                                                 | 4.680668  | -0.01733  | -0.179802 |                                             |               |
| C                                                                                 | 5.745862  | 0.57036   | 0.515844  |                                             |               |
| C                                                                                 | 4.905335  | -1.227911 | -0.846576 |                                             |               |
| C                                                                                 | 6.989879  | -0.037229 | 0.562693  |                                             |               |
| C                                                                                 | 6.15252   | -1.83801  | -0.802735 |                                             |               |
| C                                                                                 | 7.196671  | -1.251712 | -0.098315 |                                             |               |
| O                                                                                 | 8.001267  | 0.561597  | 1.254755  |                                             |               |
| O                                                                                 | 8.45104   | -1.780393 | -0.004927 |                                             |               |
| H                                                                                 | -4.030914 | 1.212605  | -1.496062 |                                             |               |
| H                                                                                 | -4.433762 | -1.182044 | -2.276475 |                                             |               |
| H                                                                                 | -4.543294 | 0.270458  | 2.326243  |                                             |               |
| H                                                                                 | -5.749983 | -2.550499 | -0.565297 |                                             |               |
| H                                                                                 | -6.516165 | -0.090029 | -0.717417 |                                             |               |
| H                                                                                 | -0.157613 | -0.983295 | -1.028627 |                                             |               |
| H                                                                                 | -2.58476  | 2.541361  | -0.567248 |                                             |               |
| H                                                                                 | -5.002249 | -2.196048 | 1.829242  |                                             |               |
| H                                                                                 | -2.203538 | -1.2283   | 1.073355  |                                             |               |
| H                                                                                 | -2.855061 | -1.450986 | 2.704502  |                                             |               |

| H                                                                                | -3.548929 | -3.094627 | -1.129028 |                                             |               |
|----------------------------------------------------------------------------------|-----------|-----------|-----------|---------------------------------------------|---------------|
| H                                                                                | -6.637641 | -0.490501 | 1.969899  |                                             |               |
| H                                                                                | -1.81666  | 0.980945  | 1.69017   |                                             |               |
| H                                                                                | 2.18501   | -0.879843 | -0.941633 |                                             |               |
| H                                                                                | 1.658069  | 2.843122  | -0.164855 |                                             |               |
| H                                                                                | -1.445823 | 4.44072   | -0.12799  |                                             |               |
| H                                                                                | 3.403658  | 1.681862  | 0.220601  |                                             |               |
| H                                                                                | 5.609758  | 1.512671  | 1.036884  |                                             |               |
| H                                                                                | 4.113179  | -1.699074 | -1.415804 |                                             |               |
| H                                                                                | 6.330687  | -2.774293 | -1.322023 |                                             |               |
| H                                                                                | 8.798004  | 0.015993  | 1.200926  |                                             |               |
| H                                                                                | 8.504774  | -2.619047 | -0.481483 |                                             |               |
| Astringin calculated at M06-2X-D3/6-311+G** level in aqueous SMD solvation model |           |           |           |                                             |               |
| Cartesian coordinates of optimized molecule                                      |           |           |           | Thermal properties /(Hartree)               |               |
| Symbol                                                                           | X         | Y         | Z         | Zero-point correction                       | 0.408866      |
| C                                                                                | -3.863986 | 0.334769  | -0.88236  | Thermal correction to Energy                | 0.436084      |
| O                                                                                | -2.54708  | -0.137667 | -1.108184 | Thermal correction to Enthalpy              | 0.437028      |
| O                                                                                | -4.067761 | 0.742347  | 0.446787  | Thermal correction to Gibbs Free Energy     | 0.351168      |
| C                                                                                | -4.81406  | -0.782134 | -1.317611 | Sum of electronic and zero-point Energies   | -1451.873802  |
| C                                                                                | -1.49012  | 0.695675  | -0.848642 | Sum of electronic and thermal Energies      | -1451.846584  |
| C                                                                                | -4.09707  | -0.270494 | 1.467243  | Sum of electronic and thermal Enthalpies    | -1451.845640  |
| C                                                                                | -4.878324 | -1.931238 | -0.298134 | Sum of electronic and thermal Free Energies | -1451.931500  |
| O                                                                                | -6.103863 | -0.236836 | -1.536312 | Single point energy at def2-TZVPD basis set | -1452.4367737 |
| C                                                                                | -0.237565 | 0.086071  | -0.841347 |                                             |               |
| C                                                                                | -1.627555 | 2.057744  | -0.596997 |                                             |               |
| C                                                                                | -5.07543  | -1.391105 | 1.117633  |                                             |               |
| C                                                                                | -2.70001  | -0.740274 | 1.861727  |                                             |               |
| O                                                                                | -3.696961 | -2.712027 | -0.286326 |                                             |               |
| C                                                                                | 0.909086  | 0.839578  | -0.579714 |                                             |               |
| C                                                                                | -0.470172 | 2.798944  | -0.343504 |                                             |               |
| O                                                                                | -6.415659 | -0.901894 | 1.149479  |                                             |               |
| O                                                                                | -1.929785 | 0.34687   | 2.365088  |                                             |               |
| C                                                                                | 2.205414  | 0.145066  | -0.577739 |                                             |               |
| C                                                                                | 0.785903  | 2.212715  | -0.330803 |                                             |               |
| O                                                                                | -0.537864 | 4.144541  | -0.097368 |                                             |               |
| C                                                                                | 3.369179  | 0.666979  | -0.166839 |                                             |               |
| C                                                                                | 4.667379  | -0.021209 | -0.171805 |                                             |               |
| C                                                                                | 5.737693  | 0.574932  | 0.508303  |                                             |               |
| C                                                                                | 4.886545  | -1.239119 | -0.827197 |                                             |               |
| C                                                                                | 6.981984  | -0.031739 | 0.549869  |                                             |               |
| C                                                                                | 6.134539  | -1.847457 | -0.788705 |                                             |               |
| C                                                                                | 7.184106  | -1.251904 | -0.100278 |                                             |               |
| O                                                                                | 8.004549  | 0.576614  | 1.229361  |                                             |               |



|   |           |           |           |  |  |
|---|-----------|-----------|-----------|--|--|
| O | 8.443727  | -1.781959 | -0.014328 |  |  |
| H | -4.05168  | 1.223359  | -1.488651 |  |  |
| H | -4.461641 | -1.170025 | -2.275554 |  |  |
| H | -4.502027 | 0.256103  | 2.336337  |  |  |
| H | -5.74663  | -2.547902 | -0.551169 |  |  |
| H | -6.518256 | -0.102221 | -0.670671 |  |  |
| H | -0.169051 | -0.978185 | -1.035754 |  |  |
| H | -2.590269 | 2.552742  | -0.587883 |  |  |
| H | -4.949358 | -2.20932  | 1.832795  |  |  |
| H | -2.179688 | -1.230335 | 1.038392  |  |  |
| H | -2.802837 | -1.455277 | 2.679946  |  |  |
| H | -3.547513 | -3.060111 | -1.173584 |  |  |
| H | -6.582952 | -0.495181 | 2.008158  |  |  |
| H | -1.777984 | 0.971219  | 1.643219  |  |  |
| H | 2.170157  | -0.882457 | -0.929563 |  |  |
| H | 1.648933  | 2.837083  | -0.136086 |  |  |
| H | -1.456209 | 4.440983  | -0.128491 |  |  |

Table S3.4 The partial calculation results of cytosine, adenine, and guanine

| Cytosine calculated at M06-2X-D3/6-311+G** level in aqueous SMD solvation model |           |           |           |                                             |              |
|---------------------------------------------------------------------------------|-----------|-----------|-----------|---------------------------------------------|--------------|
| Cartesian coordinates of optimized molecule                                     |           |           |           | Thermal properties /(Hartree)               |              |
| Symbol                                                                          | X         | Y         | Z         | Zero-point correction                       | 0.098972     |
| N                                                                               | -1.277274 | 0.885239  | -0.000408 | Thermal correction to Energy                | 0.105594     |
| C                                                                               | -1.172252 | -0.497976 | 0.000001  | Thermal correction to Enthalpy              | 0.106539     |
| O                                                                               | -2.214319 | -1.171305 | -0.000007 | Thermal correction to Gibbs Free Energy     | 0.068305     |
| N                                                                               | 0.062698  | -1.050556 | 0.00051   | Sum of electronic and zero-point Energies   | -394.829026  |
| C                                                                               | 1.133801  | -0.258962 | 0.000098  | Sum of electronic and thermal Energies      | -394.822404  |
| N                                                                               | 2.340002  | -0.838161 | -0.000073 | Sum of electronic and thermal Enthalpies    | -394.821460  |
| C                                                                               | 1.04922   | 1.171107  | 0.000219  | Sum of electronic and thermal Free Energies | -394.859694  |
| C                                                                               | -0.192625 | 1.700688  | 0.000033  | Single point energy at def2-TZVPD basis set | -394.9725806 |
| H                                                                               | -2.211417 | 1.277331  | -0.000567 |                                             |              |
| H                                                                               | 2.41607   | -1.844755 | -0.001446 |                                             |              |
| H                                                                               | 3.179651  | -0.279061 | -0.001079 |                                             |              |
| H                                                                               | 1.935566  | 1.788168  | 0.000519  |                                             |              |
| H                                                                               | -0.392172 | 2.763958  | 0.000324  |                                             |              |
| Adenine calculated at M06-2X-D3/6-311+G** level in aqueous SMD solvation model  |           |           |           |                                             |              |
| Cartesian coordinates of optimized molecule                                     |           |           |           | Thermal properties /(Hartree)               |              |
| Symbol                                                                          | X         | Y         | Z         | Zero-point correction                       | 0.112865     |
| N                                                                               | 1.954137  | -0.472269 | 0.000004  | Thermal correction to Energy                | 0.120137     |
| C                                                                               | 1.339431  | -1.667449 | 0.001152  | Thermal correction to Enthalpy              | 0.121081     |
| N                                                                               | 0.044234  | -1.930295 | 0.002199  | Thermal correction to Gibbs Free Energy     | 0.081104     |
| C                                                                               | -0.718262 | -0.818152 | 0.001631  | Sum of electronic and zero-point Energies   | -467.185678  |
| C                                                                               | -0.191016 | 0.469621  | -0.000782 | Sum of electronic and thermal Energies      | -467.178405  |
| C                                                                               | 1.202874  | 0.634703  | -0.002459 | Sum of electronic and thermal Enthalpies    | -467.177461  |
| N                                                                               | 1.80314   | 1.843638  | -0.043964 | Sum of electronic and thermal Free Energies | -467.217438  |
| N                                                                               | -2.092006 | -0.769056 | 0.002452  | Single point energy at def2-TZVPD basis set | -467.3512634 |
| C                                                                               | -2.372917 | 0.516885  | 0.000129  |                                             |              |
| N                                                                               | -1.278513 | 1.312944  | -0.001881 |                                             |              |
| H                                                                               | 2.004962  | -2.523583 | 0.002758  |                                             |              |
| H                                                                               | 1.26578   | 2.673972  | 0.159218  |                                             |              |
| H                                                                               | 2.79699   | 1.881003  | 0.133925  |                                             |              |
| H                                                                               | -3.367929 | 0.93493   | -0.000428 |                                             |              |
| H                                                                               | -1.277415 | 2.325288  | -0.005171 |                                             |              |
| Guanine calculated at M06-2X-D3/6-311+G** level in aqueous SMD solvation model  |           |           |           |                                             |              |
| Cartesian coordinates of optimized molecule                                     |           |           |           | Thermal properties /(Hartree)               |              |
| Symbol                                                                          | X         | Y         | Z         | Zero-point correction                       | 0.117547     |
| N                                                                               | 1.739165  | -1.486974 | 0.001485  | Thermal correction to Energy                | 0.125758     |
| C                                                                               | 2.702896  | -0.51109  | 0.00275   | Thermal correction to Enthalpy              | 0.126702     |
| N                                                                               | 2.20507   | 0.6958    | 0.001038  | Thermal correction to Gibbs Free Energy     | 0.084548     |
| C                                                                               | 0.532421  | -0.855383 | -0.001379 | Sum of electronic and zero-point Energies   | -542.435089  |
| N                                                                               | -0.684759 | -1.442403 | 0.001174  | Sum of electronic and thermal Energies      | -542.426878  |

|   |           |           |           |                                             |             |
|---|-----------|-----------|-----------|---------------------------------------------|-------------|
| C | -1.668495 | -0.572417 | -0.002349 | Sum of electronic and thermal Enthalpies    | -542.425934 |
| N | -2.952309 | -0.992007 | -0.053814 | Sum of electronic and thermal Free Energies | -542.468087 |
| N | -1.472226 | 0.785044  | -0.001601 | Single point energy at def2-TZVPD basis set | -542.613847 |
| C | -0.233542 | 1.433536  | -0.000249 |                                             |             |
| O | -0.179404 | 2.663781  | 0.00223   |                                             |             |
| C | 0.837584  | 0.496952  | -0.001709 |                                             |             |
| H | 1.897622  | -2.487315 | 0.002382  |                                             |             |
| H | 3.752379  | -0.760314 | 0.005048  |                                             |             |
| H | -3.110241 | -1.96918  | 0.148595  |                                             |             |
| H | -3.686952 | -0.351589 | 0.214332  |                                             |             |
| H | -2.287351 | 1.392335  | -0.008555 |                                             |             |
